# Supplementary material
Source: HighWire-hosted journal article supplement (https://www.rcpjournals.org/highwire/filestream/13807/field_highwire_adjunct_files/0/Vardy_Supplementary_material_S1.pdf)

# SA-ICT : Community Delirium TIME Pathway

Triggers - Investigation - Management - Engage & Explore

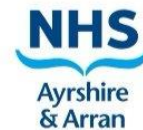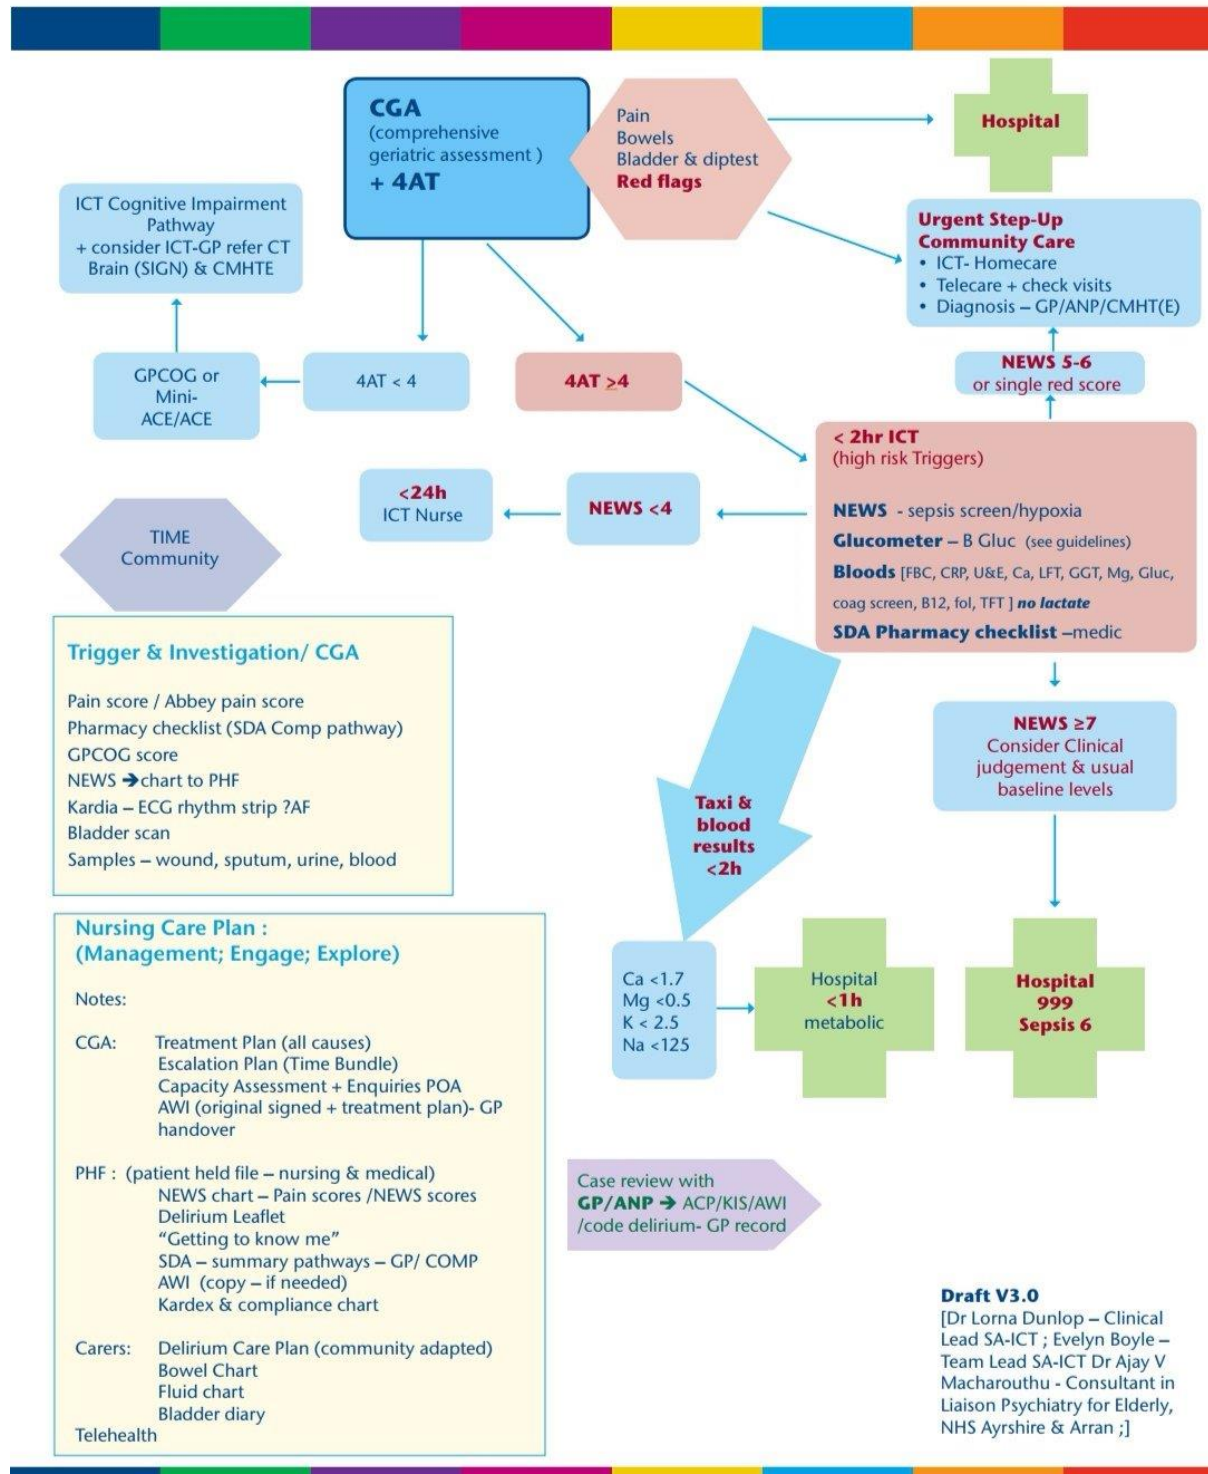

Supplement: Vardy_Supplementary_material_S1.pdf [file Vardy_Supplementary_material_S1.pdf]
